# Supplementary material
Source: PubMed Central journal article supplement (PMC2661867)
Supplement: blood-2008-06-165340_1.pdf [file blood-2008-06-165340_1.pdf]

---

| <b>Morpholino</b> | <b>Target</b> | <b>Sequence</b>                           | <b>Knockdown</b> |
|-------------------|---------------|-------------------------------------------|------------------|
| trf-MO1           | ATG           | 5'-GCAGGACCTT <u>CATA</u> CTGGGCTTCAC-3'  | Transferrin-a    |
| trf-MO1 M         |               | 5'-GCAcGAgCTTgATACTcGCCTaGAC-3'           | Mismatch control |
| trf-MO2           | E4 donor      | 5'-GAGCCACACTAACCCCTCTCGACAG-3'           | Transferrin-a    |
| trf-MO2 M         |               | 5'-GAGgCACAgTAACgCCTCaCGAgAG-3'           | Mismatch control |
| TfR1a-MO1         | ATG           | 5'-AGATGGTTGTCCTGGCTTGATCC <u>AT</u> -3'  | TfR1a            |
| TfR1b-MO1         | ATG           | 5'-CCAATTGTTCTG <u>CCAT</u> GGGATCTCTG-3' | TfR1b            |
| TfR1b-MO2         | E1 donor      | 5'-AACAAACTTACCATTCTGGAAAC-3'             | TfR1b            |
| TfR2-MO1          | ATG           | 5'-CCTGTGACCGAGTCC <u>ATCAT</u> CCTTC-3'  | TfR2             |
| GATA1-MO          | E1 donor      | 5'-GTTTGGACTCACCTGGACTGTGTCT-3'           | GATA1            |

---
